# Supplementary material for: Transcriptome Analysis of the Carmine Spider Mite,Tetranychus cinnabarinus(Boisduval, 1867) (Acari: Tetranychidae), and Its Response toβ-Sitosterol
Source: Hindawi journal article supplement (doi:10.1155/2015/794718), 2015-01-01
Supplement: f1 [file 794718.f1.pdf]

**Table S1.** Primers used for qRT-PCR analyses.

| <b>Gene name</b>         | <b>Forward primer</b>        | <b>Reverse primer</b>         |
|--------------------------|------------------------------|-------------------------------|
| <i>α-tub</i>             | ACTACGCTCGTGGCCACTATAC<br>AA | ACCAGATCCAGTTCCACCTCCA<br>AA  |
| β-actin                  | CAGCCATGTATGTTGCCATC         | AAATCACGACCAGCCAAATC          |
| T2_Unigene_BMK.252<br>4  | ATTGAACACTTGCCTCGGTAT        | CCCCTTGAAAATGTAACCTTCGT       |
| CL8369Contig1            | CAACTCGTGTATCTTGGTTCTCT      | ATGCCCGATGTTTACTTTACC         |
| CL1378Contig1            | TAGCTCCTCTTGGTAGTCTTGT       | GATAGCTTTACCTCCGACAACA        |
| T2_Unigene_BMK.842<br>6  | TAGCTCCTCTTGGTAGTCTTGT       | ATAGCTTTACCTCCGACAACA         |
| T1_Unigene_BMK.156<br>10 | GTTTCCAAAATCCGAGTCAGT        | TTTAGGTTACCAATTTGACCG         |
| CL121Contig1             | ATTGAAGCTGAAACTGCCGAAA<br>C  | ACTTGAGGCTAAAATGAAACCA<br>C   |
| T2_Unigene_BMK.298<br>2  | TTCTCTAGGCAATTGTACTCTC       | ACTTTAGACTACGCCAAGCA          |
| CL5336Contig1            | GCTCCTCAAAAAGATATTTGTC<br>C  | AAACAAATGTGAATTCAGGG<br>C     |
| T2_Unigene_BMK.712<br>2  | TGTCTCATTTC AAGCGTGGT        | TATTCCTCCGATGTAGCCACT         |
| T1_Unigene_BMK.744<br>1  | TGTATTGCGTTATCCGAGCTT        | CAGCCAATGAGCGTTCAGT           |
| CL9149Contig1            | TTAGCAGTGATAGACGACCCAA       | ATCCAATCGTGACTTGTGCAT         |
| CL7517Contig1            | GGATACTTATTGGCTCGAACCT       | TGACCACTCTTTTGCTCGTT          |
| T2_Unigene_BMK.360<br>3  | ATACTTATTGGCTCGGACCT         | AGATTCTTTATGTTGACCGCTCT<br>TT |
| CL1681Contig1            | TGATCCAGACGATGAAACCTC        | ATCGGCATCCAATTCACCAC          |
| CL7152Contig1            | CAATGAGCAGCAACAGCGA          | GCTTGTGACTCGGTTCCCT           |
| T2_Unigene_BMK.746<br>8  | AAATTATCGGCTCCAGTCCCA        | CCTTGCTGGAGTTACTTCTCGT        |
| T2_Unigene_BMK.370<br>2  | AGAATTAACTGTTGTCCGTCCC       | ACACAATTTACTCCCGTTTGCT        |
| T2_Unigene_BMK.659<br>2  | TTTTGTCCGAGAAAGCCTTGT        | CTAACCGCTGCTCACTGTGTCAC<br>T  |
| CL9567Contig1            | AGGCTCCATCAACCTTACCTTC       | ATAACACGGATAGGTTGAACAG<br>G   |
| T1_Unigene_BMK.269<br>0  | ATATCTACAAATGATGCCGCT        | GGGCATCTGAGCAATAAC            |
| CL2236Contig1            | AAACATTGGCTTGATGACGA         | ACTCCTTTGGCTGATTTCGTTG        |
| CL5455Contig1            | TCCTTTCAAACCAGGCATTCCA       | CTAGTGGAAAACCCGGTCCT          |
| T2_Unigene_BMK.168<br>9  | TCATTTGAGATTTGGCGTTCCT<br>T  | ATATTCTCAAAGGTGGACGCAA        |

|                    |                         |                                |
|--------------------|-------------------------|--------------------------------|
| CL2365Contig1      | ACTCCAGCTTCATACGTCTCC   | CGCTGATCTTCTTTGATGCTGTC<br>T   |
| CL8324Contig1      | TGGACACATCAGGCATT       | AAAGCCCTGGATAAACAC             |
| T1_Unigene_BMK.968 | ATGCTGCAGGGATAACTACAAC  | CACACTTTATACGTCGCTGTC          |
| 1                  |                         |                                |
| T3_Unigene_BMK.539 | GTCTTCATTAACTTGGCTTGTCT | TTCTTCACAGGCAACAAGCTC          |
| 1                  |                         |                                |
| T2_Unigene_BMK.859 | TTCTTCACAGGCAACAAGCTC   | TCATTAACTTGGCTTGTCTGG          |
| 6                  |                         |                                |
| CL8591Contig1      | TAACTTGCTGCTACCGGA      | GAAAGCACCTAAACCAAGTCCA         |
| T3_Unigene_BMK.570 | ACCCATTTAAAATAGCCTCGCA  | ATGAACCAGCAGTTTTGATTCC         |
| 9                  |                         |                                |
| T2_Unigene_BMK.129 | CCGTGATGATCCTTATGCTTG   | GATCTTTGCTCTTCTCGCCTT          |
| 38                 |                         |                                |
| CL10295Contig1     | GATTTCCAAAACGTCCGGCAG   | CCAAACAGAGGATTCGGCAAC          |
| CL3394Contig1      | TCGACTCGCAAACGCCACT     | ATTACTAACCCAACACTACGCTGT<br>GA |
| CL7961Contig1      | AATGGAAGAAACACGGAAC     | GGTTTGATTCCAGCAGTT             |
| CL8740Contig1      | TTTCGCAAGCATTTCGTCCC    | GAGCCAATTCATTCAATCGTCC<br>A    |
| T2_Unigene_BMK.421 | AATGTTTGATGAGCTGACTTTG  | GTTCGGAATTCTGTCAACAACC         |
| 2                  |                         |                                |
| T2_Unigene_BMK.172 | AACCCTCCAGCTCAACAATC    | GGTTTGCTTTTCATCTTTGGCT         |
| 24                 |                         |                                |
| CL8128Contig1      | CAAATTACCTCGAGAAAGCCAC  | TTGACCCACATTGAGTCC             |
| CL710Contig1       | AAAGACGACAGTGATTATGCC   | TGAAGTCAAGCCAAACAAATAG         |
| T2_Unigene_BMK.632 | ACAATCCCTACGCTTATGCTC   | CCCATCCCCACATCATCTTTC          |
| 4                  |                         |                                |

---

**Table S2.** Comparison of CYP gene number in Insecta, Crustacea and *T. urticae*.

|                                | CYP2<br>clan | mitochondrial CYP<br>clan | CYP3<br>clan | CYP4<br>clan | Total |
|--------------------------------|--------------|---------------------------|--------------|--------------|-------|
| <b>Insecta</b>                 |              |                           |              |              |       |
| <i>Drosophila melanogaster</i> | 7            | 11                        | 36           | 32           | 88    |
| <i>Anopheles gambiae</i>       | 10           | 9                         | 40           | 46           | 105   |
| <i>Aedes aegypti</i>           | 12           | 9                         | 82           | 57           | 160   |
| <i>Bombyx mori</i>             | 7            | 12                        | 30           | 36           | 85    |
| <i>Apis mellifera</i>          | 8            | 6                         | 28           | 4            | 46    |
| <i>Nasonia vitripennis</i>     | 7            | 7                         | 48           | 30           | 92    |
| <i>Tribolium castaneum</i>     | 8            | 9                         | 72           | 45           | 134   |
| <i>Acyrtosiphon pisum</i>      | 10           | 8                         | 23           | 23           | 64    |
| <i>Pediculus humanus</i>       | 8            | 8                         | 11           | 9            | 36    |
| <b>Crustacea</b>               |              |                           |              |              |       |
| <i>Daphnia pulex</i>           | 20           | 6                         | 12           | 37           | 75    |
| <b>Acari</b>                   |              |                           |              |              |       |
| <i>Tetranychus urticae</i>     | 48           | 5                         | 10           | 23           | 86    |
| <i>T. cinnabarinus</i>         | 49           | 3                         | 7            | 22           | 81    |

Data are derived from Grbic *et al.* and this study.

**Table S3.** Gene numbers of CYP sequences of *T. cinnabarinus*.

| gene ID                  | gene ID                  | gene ID                  | gene ID                  | gene ID                  |
|--------------------------|--------------------------|--------------------------|--------------------------|--------------------------|
| CL6302Contig1            | CL7962Contig1            | T2_Unigene_BM<br>K.15594 | T2_Unigene_B<br>MK.2540  | T1_Unigene_B<br>MK.12473 |
| CL7880Contig1            | T2_Unigene_B<br>MK.5372  | T1_Unigene_B<br>MK.16633 | CL8013Contig1            | T2_Unigene_B<br>MK.3737  |
| CL10156Contig1           | T2_Unigene_B<br>MK.14385 | CL7701Contig1            | T3_Unigene_B<br>MK.3421  | CL5611Contig1            |
| CL1143Contig1            | T2_Unigene_B<br>MK.8419  | T2_Unigene_BM<br>K.16031 | T2_Unigene_B<br>MK.11945 | CL5259Contig1            |
| CL2950Contig1            | T2_Unigene_B<br>MK.14948 | CL1520Contig1            | T3_Unigene_B<br>MK.5800  | T2_Unigene_B<br>MK.6710  |
| T3_Unigene_B<br>MK.5585  | T2_Unigene_B<br>MK.11299 | CL533Contig2             | T2_Unigene_B<br>MK.8805  | CL7566Contig1            |
| T2_Unigene_B<br>MK.16778 | T3_Unigene_B<br>MK.9327  | CL891Contig1             | CL4296Contig1            | T3_Unigene_B<br>MK.1196  |
| CL299Contig1             | T2_Unigene_B<br>MK.14798 | T1_Unigene_BM<br>K.15369 | T2_Unigene_B<br>MK.14016 | T1_Unigene_B<br>MK.3580  |
| T2_Unigene_B<br>MK.8914  | T1_Unigene_B<br>MK.9503  | CL7269Contig1            | CL2243Contig1            | CL2387Contig1            |
| CL5888Contig1            | T2_Unigene_B<br>MK.5358  | T3_Unigene_BM<br>K.2483  | CL8423Contig1            | T1_Unigene_B<br>MK.8630  |
| T2_Unigene_B<br>MK.7768  | CL539Contig1             | T1_Unigene_BM<br>K.12554 | CL6061Contig1            | T1_Unigene_B<br>MK.9148  |
| T1_Unigene_B<br>MK.5609  | CL3603Contig1            | CL3793Contig1            | CL9736Contig1            | T2_Unigene_B<br>MK.2805  |
| CL934Contig1             | T1_Unigene_B<br>MK.2070  | CL8789Contig1            | CL8083Contig1            | CL1685Contig1            |
| CL8897Contig1            | CL9195Contig1            | T3_Unigene_BM<br>K.1479  | T2_Unigene_B<br>MK.5369  | CL8107Contig1            |
| CL3234Contig1            | T2_Unigene_B<br>MK.3919  | CL8768Contig1            | T2_Unigene_B<br>MK.13135 | T2_Unigene_B<br>MK.12265 |
| T1_Unigene_B<br>MK.8438  | T3_Unigene_B<br>MK.15246 | CL9813Contig1            | CL2486Contig1            | CL5098Contig1            |
| T2_Unigene_B<br>MK.7326  |                          |                          |                          |                          |

**Table S4.** An overview of GSTs and the number of genes belonging to different subgroups.

| GSTfa   | <i>D.</i>      | <i>A.Gam</i> | <i>A.melli</i> | <i>N.</i>      | <i>T.</i>     | <i>B.</i> | <i>H.</i>   | <i>T.urti</i> | <i>T.</i>       |
|---------|----------------|--------------|----------------|----------------|---------------|-----------|-------------|---------------|-----------------|
| mily    | <i>melanog</i> | <i>biae</i>  | <i>fera</i>    | <i>vitripe</i> | <i>castan</i> | <i>mo</i> | <i>sapi</i> | <i>cae</i>    | <i>cinnabar</i> |
|         | <i>aster</i>   |              |                | <i>nnis</i>    | <i>eum</i>    | <i>ri</i> | <i>ens</i>  |               | <i>inus</i>     |
| alpha   | -              | -            | -              | -              | -             | -         | 5           | -             | -               |
| delta   | 11             | 12           | 1              | 5              | 3             | 4         | -           | 16            | 9               |
| epsilon | 14             | 8            | -              | -              | 19            | 8         | -           | -             | -               |
| mu      | -              | -            | -              | -              | -             | -         | 5           | 12            | 10              |
| pi      | -              | -            | -              | -              | -             | -         | 1           | -             | -               |
| omega   | 5              | 1            | 1              | 2              | 4             | 4         | 2           | 2             | 3               |
| sigma   | 1              | 1            | 4              | 8              | 7             | 2         | 1           | -             | -               |
| theta   | 4              | 2            | 1              | 3              | 1             | 1         | 2           | 1             | 3               |
| zeta    | 2              | 1            | 1              | 1              | 1             | 2         | 1           | -             | 2               |
| unkno   | -              | 3            | -              | -              | -             | 2         | -           | -             | 7               |
| wn      |                |              |                |                |               |           |             |               |                 |
| kappa   | -              | -            | -              | -              | -             | -         | -           | 1             | 1               |
| Total   | 37             | 28           | 8              | 19             | 35            | 23        | 17          | 31            | 35              |

Data are derived from Grbic *et al.* and this study.

**Table S5.** Gene numbers of GST sequences of *T. cinnabarinus*.

| gene ID                  | gene ID                 | gene ID                  | gene ID                  | gene ID                 |
|--------------------------|-------------------------|--------------------------|--------------------------|-------------------------|
| T2_Unigene_BM<br>K.3207  | T2_Unigene_B<br>MK.8773 | CL7870Contig1            | CL677Contig1             | T1_Unigene_B<br>MK.3507 |
| CL1968Contig1            | CL7748Contig1           | CL2232Contig1            | CL5326Contig1            | CL8336Contig1           |
| T2_Unigene_BM<br>K.1887  | T1_Unigene_B<br>MK.3657 | CL1977Contig1            | T3_Unigene_BM<br>K.16184 | T1_Unigene_B<br>MK.6540 |
| CL755Contig1             | T1_Unigene_B<br>MK.3259 | T1_Unigene_BM<br>K.3656  | CL7599Contig1            | T3_Unigene_B<br>MK.3671 |
| T2_Unigene_BM<br>K.4442  | CL8422Contig1           | T1_Unigene_BM<br>K.17845 | CL5410Contig1            | CL2068Contig1           |
| CL4394Contig1            | T3_Unigene_B<br>MK.3480 | T2_Unigene_BM<br>K.1888  | CL4707Contig1            | T1_Unigene_B<br>MK.4118 |
| T2_Unigene_BM<br>K.17617 | T1_Unigene_B<br>MK.7739 | T1_Unigene_BM<br>K.4706  | T2_Unigene_BM<br>K.3986  | T2_Unigene_B<br>MK.2893 |

**Table S6.** Gene numbers of CCE sequences of *T. cinnabarinus*.

| gene ID             | gene ID                  | gene ID                 | gene ID                  |
|---------------------|--------------------------|-------------------------|--------------------------|
| T2_Unigene_BMK.3207 | CL8507Contig1            | T1_Unigene_BMK.811<br>6 | CL4302Contig1            |
| CL4095Contig1       | T2_Unigene_BMK.853<br>5  | CL1454Contig1           | CL8507Contig1            |
| T1_Unigene_BMK.4410 | CL9410Contig1            | T3_Unigene_BMK.264<br>7 | CL7512Contig1            |
| T3_Unigene_BMK.4715 | CL9457Contig1            | CL3357Contig1           | T3_Unigene_BMK.10832     |
| T3_Unigene_BMK.5460 | T3_Unigene_BMK.105<br>49 | CL3647Contig1           | T3_Unigene_BMK.5460      |
| CL8135Contig1       | T3_Unigene_BMK.134<br>02 | CL8507Contig1           | T1_Unigene_BMK.<br>17676 |
| T2_Unigene_BMK.8420 | T3_Unigene_BMK.134<br>92 | T2_Unigene_BMK.252<br>4 | T2_Unigene_BMK.5720      |

**Table S7.** Gene numbers of differential expressed unigene sequences of *T. cinnabarinus* after exposure to  $\beta$ -Sitosterol.

| gene ID        | gene ID       | gene ID                   | gene ID                   | gene ID                  |
|----------------|---------------|---------------------------|---------------------------|--------------------------|
| CL10201Contig1 | CL5455Contig1 | CL9534Contig1             | T2_Unigene_BMK. 12<br>938 | T2_Unigene_BMK. 6<br>592 |
| CL10295Contig1 | CL5462Contig1 | CL9567Contig1             | T2_Unigene_BMK. 13<br>937 | T2_Unigene_BMK. 7<br>122 |
| CL121Contig1   | CL5765Contig1 | T1_Unigene_BMK. 14<br>313 | T2_Unigene_BMK. 14<br>070 | T2_Unigene_BMK. 7<br>273 |
| CL124Contig2   | CL710Contig1  | T1_Unigene_BMK. 15<br>610 | T2_Unigene_BMK. 15<br>551 | T2_Unigene_BMK. 7<br>468 |
| CL1378Contig1  | CL7152Contig1 | T1_Unigene_BMK. 19<br>95  | T2_Unigene_BMK. 16<br>222 | T2_Unigene_BMK. 8<br>426 |
| CL1478Contig1  | CL7387Contig1 | T1_Unigene_BMK. 26<br>90  | T2_Unigene_BMK. 16<br>89  | T2_Unigene_BMK. 8<br>596 |
| CL1681Contig1  | CL7517Contig1 | T1_Unigene_BMK. 28<br>37  | T2_Unigene_BMK. 17<br>115 | T2_Unigene_BMK. 8<br>948 |
| CL187Contig2   | CL7961Contig1 | T1_Unigene_BMK. 32<br>79  | T2_Unigene_BMK. 17<br>224 | T2_Unigene_BMK. 9<br>070 |
| CL2236Contig1  | CL8023Contig1 | T1_Unigene_BMK. 50<br>27  | T2_Unigene_BMK. 17<br>291 | T3_Unigene_BMK. 2<br>860 |
| CL2285Contig1  | CL8128Contig1 | T1_Unigene_BMK. 58<br>29  | T2_Unigene_BMK. 20<br>99  | T3_Unigene_BMK. 5<br>391 |
| CL2338Contig1  | CL8324Contig1 | T1_Unigene_BMK. 74<br>41  | T2_Unigene_BMK. 24<br>68  | T3_Unigene_BMK. 5<br>709 |
| CL2365Contig1  | CL8332Contig1 | T1_Unigene_BMK. 96<br>81  | T2_Unigene_BMK. 26<br>29  | T3_Unigene_BMK. 5<br>786 |
| CL2399Contig1  | CL8369Contig1 | T1_Unigene_BMK. 99<br>80  | T2_Unigene_BMK. 29<br>82  | T3_Unigene_BMK. 6<br>006 |
| CL2518Contig1  | CL8591Contig1 | T2_Unigene_BMK. 11<br>334 | T2_Unigene_BMK. 36<br>03  | T3_Unigene_BMK. 8<br>083 |
| CL3120Contig1  | CL8619Contig1 | T2_Unigene_BMK. 11<br>446 | T2_Unigene_BMK. 37<br>02  | T3_Unigene_BMK. 9<br>46  |
| CL3394Contig1  | CL8740Contig1 | T2_Unigene_BMK. 11<br>922 | T2_Unigene_BMK. 42<br>12  |                          |
| CL502Contig1   | CL9149Contig1 | T2_Unigene_BMK. 11<br>961 | T2_Unigene_BMK. 47<br>6   |                          |
| CL5296Contig1  | CL9211Contig1 | T2_Unigene_BMK. 12<br>082 | T2_Unigene_BMK. 61<br>63  |                          |
| CL5336Contig1  | CL9273Contig1 | T2_Unigene_BMK. 12<br>583 | T2_Unigene_BMK. 63<br>24  |                          |
